# Supplementary material for: Identification of NUF2 and FAM83D as potential biomarkers in triple-negative breast cancer
Source: PeerJ. 2020 Sep 21;8:e9975. doi: 10.7717/peerj.9975 (PMC7513746; doi:10.7717/peerj.9975)
Supplement: File S1 [file peerj-08-9975-s001.xlsx]

## Sheet: clinical_data
Test-ID	Age at diagnosis(yrs)	Menopausal status	Height(cm)	weight(kg)	lateral	Tumor type	Tumor size(cm)	Histological type	Histological type	Surgery	Number of lymph nodes analyzed	Number of metastatic lymph nodes	Chemotherapy	Radiotherapy	Local recurrence	Local recurrence time(month)	Metastasis
1	50	pre	155	67	right	primary tumor	2.1*1.6	invasive ductal carcinoma	ER(-),PR(-),Her-2(-)，Ki67(50%)	Modified radical surgery	4	0	yes	no	no	no	no
2	48	pre	155	52	right	primary tumor	2.0*1.52	invasive ductal carcinoma	ER(-),PR(-),Her-2(-)，Ki67(60%)	Modified radical surgery	8	0	yes	no	no	no	no
3	61	post	161	70	right	primary tumor	1.6*1.6	invasive ductal carcinoma	ER(-),PR(-),Her-2(-)，Ki67(35%)	Local enlargement surgery	12	0	yes	no	no	no	no
4	35	pre	160	64	right	primary tumor	1.78*1.1	invasive ductal carcinoma	ER(-),PR(-),Her-2(-)，Ki67(80%)	Modified radical surgery	8	0	yes	yes	no	no	no
5	45	pre	159	64	left	primary tumor	1.4*1.2	invasive ductal carcinoma	ER(-),PR(-),Her-2(-)，Ki67(70%)	Local enlargement surgery	5	1	yes	no	no	no	no
6	65	post	156	65	right	primary tumor	1.95*1.0	invasive ductal carcinoma	ER(-),PR(-),Her-2(-)，Ki67(20%)	Modified radical surgery	16	7	yes	yes	no	no	no
7	34	pre	159	75	right	primary tumor	1.2*0.64	invasive ductal carcinoma	ER(-),PR(-),Her-2(-)，Ki67(90%)	Modified radical surgery	16	4	yes	yes	no	no	no
8	51	pre	158	52	right	primary tumor	1.62*0.98	invasive ductal carcinoma	ER(-),PR(-),Her-2(-)，Ki67(30%)	Local enlargement surgery	14	0	yes	no	no	no	no
9	66	post	148	46	left	primary tumor	2.8*2.2	invasive ductal carcinoma	ER(-),PR(-),Her-2(-)，Ki67(10%)	Modified radical surgery	15	6	yes	yes	no	no	yes
10	42	pre	153	54	right	primary tumor	1.3*1.3	invasive ductal carcinoma	ER(-),PR(-),Her-2(-)，Ki67(60%)	Local enlargement surgery	23	0	yes	yes	no	no	no
11	56	post	158	52	right	primary tumor	1.5*1.0	invasive ductal carcinoma	ER(-),PR(-),Her-2(-)，Ki67(80%)	Modified radical surgery	5	0	yes	no	no	no	no
12	38	pre	158	60	right	primary tumor	1.0*1.0	invasive ductal carcinoma	ER(-),PR(-),Her-2(-)，Ki67(50%)	Modified radical surgery	20	0	yes	no	no	no	no
13	65	post	163	63	right	primary tumor	2.1*2.2	invasive ductal carcinoma	ER(-),PR(-),Her-2(-)，Ki67(70%)	Modified radical surgery	12	0	yes	no	no	no	no
14	50	pre	167	65	right	primary tumor	1.1*1.2	invasive ductal carcinoma	ER(-),PR(-),Her-2(-)，Ki67(50%)	Modified radical surgery	15	3	yes	no	no	no	no
