# Supplementary material for: Identification of NUF2 and FAM83D as potential biomarkers in triple-negative breast cancer
Source: PeerJ. 2020 Sep 21;8:e9975. doi: 10.7717/peerj.9975 (PMC7513746; doi:10.7717/peerj.9975)
Supplement: File S2 [file peerj-08-9975-s002.xls]

## Sheet: UP
Names	total	elements
GSE38959 GSE45827 GSE65194	105	B3GNT5
		MYBL1
		TPX2
		RDH10
		TMEM158
		CENPE
		ASPM
		UBE2S
		PIR
		ANP32E
		GINS1
		ATAD2
		BRIP1
		ANLN
		SLC7A5
		UCHL1
		BIRC5
		CT83
		PLK1
		MND1
		CCNE1
		EZH2
		CCNB2
		PRC1
		CDK1
		PSAT1
		FOXC1
		LAMP3
		FABP5
		CHEK1
		LRP8
		CENPW
		KIF11
		CEP55
		KIF18B
		RRM2
		CTPS1
		EN1
		TOP2A
		ICAM1
		GZMB
		SUV39H2
		CDC45
		ECE2
		KIF15
		SMC4
		SCRG1
		AURKA
		KIF14
		BUB1B
		MAD2L1
		DLGAP5
		HJURP
		RAD51AP1
		ARNTL2
		MKI67
		DTL
		ATP6V1C2
		FAM83D
		ZIC1
		CDCA2
		BLM
		HMMR
		EXO1
		ART3
		C9orf40
		KIF2C
		KIF20A
		MCM10
		TCF19
		CBS
		TYMS
		CDCA7
		MELK
		CENPH
		PRAME
		NDC80
		CDKN2A
		CHAC2
		OIP5
		CCNA2
		TTK
		UGT8
		CDKN3
		BUB1
		PBK
		NUF2
		NCAPG
		HORMAD1
		PRR11
		SLC16A1
		HRASLS
		TRIP13
		PTTG1
		NEK2
		CDCA5
		CDC7
		UBE2T
		FAM64A
		CENPF
		NUSAP1
		BCL2A1
		MKLP-1
		DEPDC1
		CDCA8
GSE38959 GSE45827	6	GGH
		GPSM2
		CCNB1
		CD38
		CTSV
		ALYREF
GSE45827 GSE65194	144	HACD1
		CDH3
		C1orf106
		NCAPH
		IQGAP3
		VASH2
		COL9A3
		IDO1
		TAF4B
		TCF7L1
		KLK6
		FRMD3
		OGFRL1
		MMP7
		MATR3
		IGF2BP3
		SLC25A37
		PKP1
		LOC100129518///SOD2
		MTFR2
		ARL9
		DSC3
		FABP7
		PPARA
		ACTR3B
		LOC100509445///LOC728715///OVOS///OVOS2
		LINC00673///LINC00511
		CDCA3
		TLR1
		ATL2
		UBE2C
		TMSB15B///TMSB15A
		PGBD5
		GINS4
		A2ML1
		FOXM1
		CHI3L2
		FOXP4-AS1
		PLEKHB1
		MUC16
		PM20D2
		CNKSR3
		MELTF
		SRD5A1
		PRTFDC1
		TRIM2
		TFCP2L1
		ROPN1B
		CDT1
		NFE4
		RASD2
		NFE2L3
		LEMD1
		KRT16
		DDIAS
		SLC35F6///CENPA
		GABRP
		FEN1
		SOX8
		DGAT2
		KLHDC7B
		TTLL4
		NCAPD2
		CHI3L1
		TMEM200C
		DSC2
		KLHL7
		APOBEC3B
		TTC22
		IL27RA
		STOX2
		DSG3
		VGLL1
		FAM171A1
		FDCSP
		AURKB
		UBD///GABBR1
		TTYH1
		HERC5
		MFSD4A
		GLS
		CRABP1
		TM4SF1
		VANGL2
		MSLN
		WWTR1
		ST8SIA1
		CENPL
		FERMT1
		PLA2G4A
		KLK10
		KIF4A
		ELF5
		RARRES1
		SOX10
		PHF19
		ROPN1
		BICD1
		PRRT3-AS1
		CCL20
		KIAA1804
		C16orf95
		PHGDH
		RGMA
		PRKX
		CASC7///AGO2
		NPR3
		GPM6B
		RNF150
		SHC4
		MARCO
		HLA-DOB
		IMPA2
		IQCG
		PPP1R14C
		BCL11A
		GCNT2
		KRT6B
		FAM72A///FAM72D///FAM72B///FAM72C
		LY6D
		JPH1
		ITGB8
		PTX3
		KCNK5
		CDC20
		RASGEF1A
		PRKY///PRKX
		LARP6
		GTSE1
		KCNN4
		COL27A1
		MIA
		GAL
		COCH
		SFRP1
		PSRC1
		PABPC4L
		AMD1
		CBX2
		MED30
		MMP12
		BTG3
		LOC101928195///LOC100996643///MTHFD1L
		MTPAP
GSE38959 GSE65194	3	CXCL10
		CALB2
		CP
GSE45827	4	CCL8
		GLIPR2
		GABBR2
		GBP5
GSE38959	364	E2F8
		ZNF695
		SKA3
		RTKN2
		COL3A1
		TK1
		DIAPH3
		NMB
		TMSB10
		CD163
		BRI3BP
		ARHGAP11A
		GPC4
		UBASH3B
		EPPK1
		DEPDC1B
		S100P
		RABIF
		TFDP3
		DCK
		HSPA13
		SHCBP1
		COTL1
		HMGB3
		HOMER3
		YWHAG
		C20orf24
		MMS22L
		CCL18
		LMNB1
		RFC2
		PNPLA3
		BPNT1
		SPAG5
		TMSB15A
		TBC1D31
		C19orf53
		FADS1
		PLCH1
		LRRC55
		NCS1
		TMSB15B
		GEN1
		MSL3P1
		CDC25B
		DOLK
		INHBA
		IGHG4
		TYMSOS
		GPR137C
		BCL2L12///IRF3
		LOXL2
		KNL1
		FOXK2
		KPNA2
		COL1A1
		HIST1H2AM
		HIST1H2BG
		ADAMDEC1
		DSCC1
		TACC3
		PAX6
		CHRNA5
		LOC100419920
		NDRG1
		HIST1H3I
		MEX3A
		KNTC1
		MRPL13
		CMC2
		CHML
		HIST1H1E
		GSG2
		HIST1H2AJ
		HIST1H2AE
		SLC25A5
		SDC1
		TPM3
		HIST1H2AD
		TCAM1P
		BORA
		HIST1H3B
		PXDNL
		CLEC7A
		YEATS2
		PIF1
		FNDC1
		GPRIN1
		MRPL47
		CKAP2
		MLF1
		RACGAP1
		MRPS17
		HIST1H2BI
		PXDN
		RAB35
		TTYH3
		NCF2
		IFI30
		CDCA4
		ULBP2
		CEP76
		HK2
		MICB
		MDK
		ASS1
		GJB2
		KNSTRN
		CXCL9
		TUBA1C
		HELLS
		HIST1H2BC
		FANCI
		E2F1
		LAGE3
		LTBP1
		PSMA7
		SLC16A3
		RAD54L
		TAP1
		CCNE2
		ZNF367
		METTL21A
		HIST1H2BL
		NACC2
		THBS2
		FGFR3
		PRDX4
		MTHFD1L
		C2
		CDC6
		SPC25
		HRH1
		HIST1H2BJ
		HIST1H2AL
		WDHD1
		GLDC
		CHEK2
		CD99
		KIFC1
		MCM2
		CENPU
		ZWILCH
		HMGB3P1
		ANKS6
		PKMYT1
		CXCL11
		HIST1H1A
		MCM4
		KIF18A
		MASTL
		FADS2
		CAMK1D
		CNIH4
		POP1
		HIST1H2BK
		RHBDF2
		SPON2
		LIN9
		FN1
		SEPT3
		ABCC4
		DHFR
		PIM1
		PIK3R3
		HIST1H2AB
		DLX6
		LMO4
		RHBDL2
		E2F2
		PAQR4
		IFI27
		TMPO
		KIAA1524
		ESCO2
		XG
		CKS1B
		CDKN2D
		TIPIN
		CKAP2L
		COL4A1
		SLFN11
		VCAN
		RNF182
		HIST3H2A
		TBC1D7
		PTTG2
		CHAF1A
		EIF4E2
		TTC13
		CLSPN
		HIST2H2AA4
		P2RY1
		HIST2H2BD
		RSAD2
		MX1
		HIST1H2BN
		DDX39A
		FANCA
		DEUP1
		ASAP1
		LOX
		RAD51
		CIT
		LINC01232
		CENPP
		ELAVL2
		COL5A2
		HIST1H2BB
		WARS
		NCAPG2
		LOC100506125
		PCNA
		VANGL1
		CHAF1B
		ADAMTS4
		GJC1
		CCDC150
		RPP25
		LDHA
		DESI2
		SCD
		B4GALT2
		CDKN2C
		ZBED2
		CSTB
		SRGAP2
		RAD54B
		SLC6A9
		LRR1
		CENPI
		TMEFF1
		PARPBP
		HIST1H2BM
		NMU
		TPRXL
		SECTM1
		RANBP1
		HS6ST3
		TALDO1
		EDN2
		SQLE
		VMA21
		GNG4
		ORC6
		GRPEL2
		GPRC5A
		CENPK
		ELF4
		SOX11
		SIX1
		MARS
		GSDMC
		NEURL1B
		NUDT5
		HIST1H2BD
		IL4I1
		HPSE
		FAM72D
		TICRR
		PYCR1
		COLGALT1
		DSN1
		SKIL
		HIST1H3G
		C11orf96
		CENPA
		RNFT2
		CAMP
		GMPS
		DNAPTP3///FN1
		CCNYL1
		PMEPA1
		COL11A1
		PDE4D
		HIST1H1D
		HIST2H2AB
		PRICKLE1
		TEX30
		TRIM59
		CTHRC1
		CDKN2B
		UHRF1
		DHCR7
		FAM111B
		HN1
		VEGFA
		ZWINT
		ABRACL
		TUBB3
		BCAT1
		SGO2
		AHNAK2
		HIST1H1C
		PMCH
		KIAA0101
		HIST3H2BB
		PMCHL1
		HIST1H2BH
		HIST1H2BO
		SGO1
		HMMR-AS1
		QPCT
		HOXB7
		LHX2
		H2AFZ
		ASB9
		PCOLCE2
		PLK4
		RFC4
		H2AFX
		HIST1H2AG
		ME1
		TMEM132A
		ATP1B3
		MAPK4
		PLOD2
		TMEM56
		PCSK9
		POLQ
		E2F3
		SOAT1
		HIST1H2BE
		MARC1
		NUDCD1
		MB21D1
		COL1A2
		LY96
		RMI2
		HSD17B6
		SKA1
		LAPTM4B
		COQ2
		MMP1
		COL8A1
		SKA2
		CTGF
		TROAP
		HIST2H2BE
		CENPM
		SHMT2
		GINS2
		RBL1
		STMN1
		SLC2A1
		SPC24
		PSMD14
		INCENP
		CKS2
		CIART
		ACER3
		HIST2H3A///HIST2H3C
		PNP
		TIMM8A
		S100A9
		ECT2
		LBR
		RPL39L
		ASPN
		MMP11
		CDC25A
		CTSC
		HIST1H2BF
		XRCC2
GSE65194	30	BBOX1
		KCNG1
		SERPINB5
		KCNQ4
		KLK7
		NFIB
		CRYAB
		TRIM29
		KLK5
		LDHB
		S100A2
		PROM1
		MID1
		RTP4
		CENPV
		NDRG2
		CCDC77
		LOC729680
		ZNF462
		RRAGD
		IRX1
		KRT5
		LCN2
		PTCHD1
		MYC
		SYNM
		S100A8
		SLC6A14
		NRTN
		KRT23

## Sheet: DOWN
Names	total	elements
GSE38959 GSE45827 GSE65194	56	CAPN8
		ERBB4
		KCNMA1
		CFAP70
		IGF1
		NOSTRIN
		AGR3
		GATA3
		ACADSB
		INPP4B
		FAM198B
		DACH1
		PLAT
		ITGBL1
		FOXA1
		GREB1
		C4orf32
		SLC40A1
		KIAA1324
		AZGP1
		APOD
		COL14A1
		SCGB2A2
		RAI2
		IL6ST
		CLSTN2
		TFAP2B
		MAPT
		NME5
		PGR
		DNALI1
		SYBU
		SCUBE2
		PIP
		NTN4
		C1orf115
		ANKRD30A
		PPP1R3C
		CPE
		RUNX1T1
		ESR1
		THSD4
		CX3CR1
		GLI3
		MLPH
		TBC1D9
		SCGB1D2
		TFF3
		AMIGO2
		KIF5C
		PDK4
		DNAH5
		CA12
		SEMA3C
		PRICKLE2
		AFF3
GSE38959 GSE45827	4	CLDN11
		MSX2
		RBMS3
		LIN7A
GSE45827 GSE65194	154	C9orf152
		TPSAB1
		CACNA1D
		FAM214A
		EPB41L4A
		LINC01279
		SIDT1
		TMEM45B
		CILP
		TMEM150C
		REEP6
		COL4A5
		ZEB1
		F2RL2
		SLC4A8
		CYP4X1
		BIK
		CCDC125
		SLC22A23
		OGN
		NFIA
		FRY
		NR2F1
		CAPN13
		INS-IGF2///IGF2
		TGFB3
		STARD10
		SLC16A6
		GUCY1A2
		GALNT6
		ZMAT1
		ADAMTS15
		THBS4
		CYP4Z1
		DUSP4
		BBOF1
		TTC39A
		PSMG4
		ERBB2
		KIAA1211L
		TPSB2
		ARFGEF3
		RHOB
		MUCL1
		PCDH7
		SPDEF
		ALCAM
		TMC5
		LRRC17
		FAM110C
		C14orf132
		TOX3
		CPA3
		CYP4Z2P
		PRR15
		PGAP3
		ABAT
		AZGP1P1///AZGP1
		HOXB3
		FSIP1
		SYTL2
		CELSR1
		TBX3
		DEGS2
		LINC01116
		RALGPS2
		ORMDL3
		FBP1
		C19orf33
		RAB26
		NEBL
		PP14571
		SMIM14
		HTRA1
		SERHL2
		LINC00993
		ABCC11
		GSTM3
		GPRC5C
		ADIRF
		C1orf21
		XBP1
		FBXL7
		ZCCHC24
		ANXA9
		ZFYVE16
		SYTL5
		TSPAN1
		CMBL
		HID1
		RAB30
		CRIP1
		STARD3
		LIMA1
		RAB27B
		CADPS2
		SLC2A10
		PDGFD
		TRIL
		ENPP1
		SCNN1A
		GRP
		SYT17
		CIRBP
		FOXP1
		TPSB2///TPSAB1
		GPRC5A
		GFRA1
		ABLIM3
		PRR15L
		KITLG
		SFRP4
		MIR29C///MIR29B2
		KIAA0485
		DCN
		ZNF703
		SPRED2
		NPNT
		DNAJC12
		AREG
		MAST4
		CAMK2N1
		ACOX2
		C4B_2///C4B///C4A
		NAT1
		FAM110B
		FBN1
		TFF1
		MIEN1
		AR
		HOXB2
		ZG16B
		GPR160
		LFNG
		LOC285097
		GPD1L
		VAV3
		SLC7A8
		EVL
		ITGB5
		RAB17
		REEP1
		GALNT10
		LOC100507577///LONP2///SIAH1
		AGR2
		WFS1
		LAMP5
		DHRS2
		SERHL2///SERHL
		ASPN
		SPOCK1
		SLC7A2
		MYB
		SLC44A4
GSE38959 GSE65194	7	CXCL14
		HMGCS2
		TPRG1
		SEPP1
		DCLK1
		DST
		CLIC6
GSE45827	15	PTGER3
		APBB2
		MUM1L1
		TIMP3
		HSPB2-C11orf52///C11orf52///HSPB2
		BCAM
		IGF1R
		AOC3
		SYTL4
		OMD
		RSPH1
		PEX11A
		CYBRD1
		EPB41L5
		FAM174B
GSE38959	249	ARHGAP20
		OR5P3
		PTN
		KLHL13
		CACNA1C
		LETM2
		MPPED2
		ABCG2
		PPP1R14A
		NAP1L2
		SLC27A6
		ITIH5
		SIGLEC15
		KCNE1
		PDE1C
		PDE2A
		FAM101A
		SYNPO2
		NXNL2
		ANKRD20A2
		TUBB2B
		SCGB1D1
		JAM3
		POTED
		BTNL9
		ATP1A2
		ARL4A
		AFAP1L2
		NTRK2
		SP100
		DMKN
		CDO1
		CNN1
		SDPR
		DKK3
		RHD
		IQCA1
		TCEAL7
		C1orf132
		RERG
		CXCL2
		TAT
		POTEC
		LIFR
		ANKRD30BP3
		MAOA
		KLF3-AS1
		FIGF
		LOC284112
		ACSM1
		PDGFA
		LOC100509780
		POTEB3
		MASP2
		SLC26A3
		BCL2
		ZNF175
		PTHLH
		CD36
		CXCL12
		CNTNAP3
		MYBPC1
		ANGPTL7
		GSTM4
		NECAB1
		TMEM237
		PRKD1
		CBX7
		IRS1
		CELF6
		JADE2
		FMO5
		TNS4
		ABCA11P
		SPATA18
		CCL28
		JAM2
		SP2
		IRX2
		OXTR
		PIGR
		SNRPN
		KIAA1456
		SCN4A
		SPARCL1
		LRP2
		TSGA10
		SEMA6D
		TENM2
		FGF1
		C6orf10
		LOC399716
		BEX1
		GRPR
		HOXA4
		PLPPR1
		ROBO3
		TSHZ2
		C1orf64
		LOC105370792
		ARHGEF38
		HOXA9
		HOXA3
		TMEM144
		ITM2A
		HBB
		KRT15
		RHOJ
		COX6B2
		COX7A1
		FAM189A2
		PWAR5
		GPRASP1
		MAP2K6
		COL17A1
		COL4A6
		SCN7A
		LTBP2
		CEP126
		TPTE
		RIC3
		DCX
		LAMB3
		ANKRD20A11P
		CA8
		SOCS2
		XKR6
		GSTM2P1
		IQUB
		NAV3
		MATN2
		CMYA5
		SPAG8
		CHL1
		TGFBR2
		CARMN
		IL33
		ANO1
		SEMA3G
		ITGA11
		NEDD4L
		MEG3
		MYH3
		EDN3
		MIR100HG
		PI15
		TTC6
		NTF4
		LPCAT2
		KCNMB1
		CCDC158
		CFAP43
		AK5
		KIT
		SBSPON
		SCN4B
		FAXDC2
		PDZK1
		PDGFRA
		NPY2R
		DMD
		ACTA2-AS1
		PDLIM3
		HOXA-AS3
		LOC105379426
		KCNC2
		SH3BGRL2
		MYH11
		LINC00965
		KIF5A
		HOXA5
		NAV2
		PAK3
		IL20RA
		KRT5
		CD200
		ANKRD20A8P
		TPM1
		SEMA5A
		PIK3C2G
		STC2
		NRG2
		TECPR2
		MGP
		TUB
		VIPR1
		WIF1
		GSTT2
		ACTA2
		FMOD
		LUZP2
		GRIA4
		LOC100129846///RBPMS
		FAM47E
		ALDH7A1
		EFCAB1
		LCA5
		N4BP2L1
		HOTAIRM1
		SCGB3A1
		NRSN1
		MME
		SCN2B
		MAMDC2
		HS3ST4
		TESC
		TMTC1
		GSTM2
		CYP4F11
		KCNJ16
		ETV1
		ADAMTS5
		NRG1
		IGHA2///IGHA1///IGH
		DCDC2
		ANKRD20A12P
		FANK1
		INHBB
		LOC101930370
		HOXA7
		MAGI1
		BHLHE41
		LAMA3
		DYNLRB2
		RNF128
		ZNF214
		C2orf40
		EGR3
		TMEM26
		SNURF
		MAGI2-AS3
		SAMD5
		BEND5
		FGF14
		HCAR1
		GRAMD3
		SMYD1
		RERGL
		TP63
		JCHAIN
		CSRNP3
		SEMA6A
		CTTNBP2
		NDN
		DAAM2
		DMRTC1
		MIR4697HG
		LINC00504
		GRAMD1C
GSE65194	32	CEACAM6
		CDK12
		ACKR1
		NBEA
		GRB7
		SLC1A1
		CEACAM5
		PNMT
		CCDC80
		MUC1
		ADRA2A
		CNTNAP2
		RET
		TM7SF2
		ATP7B
		STEAP4
		ADH1B
		FABP4
		ACACB
		SDR16C5
		SHISA2
		FOSB
		BMPR1B
		ABI3BP
		COL10A1
		CLCA2
		ADGRV1
		SLITRK6
		ALDH3B2
		CYP2B7P///CYP2B6
		UGT2B28
		EEF1A2
