# Supplementary material for: Identification of NUF2 and FAM83D as potential biomarkers in triple-negative breast cancer
Source: PeerJ. 2020 Sep 21;8:e9975. doi: 10.7717/peerj.9975 (PMC7513746; doi:10.7717/peerj.9975)
Supplement: File S3 [file peerj-08-9975-s003.xlsx]

## Sheet: Sheet1
Category	Term	PValue	FDR	Genes
GOTERM_BP_DIRECT	GO:0051301~cell division	2.05272e-22	3.29375e-19	NEK2, AURKA, PTTG1, FAM83D, CCNE1, KIF2C, CDCA8, CDCA7, NCAPG, OIP5, CDCA2, BUB1, CCNA2, CDCA5, CDC7, KIF14, CDK1, KIF11, TPX2, NUF2, CENPF, KIF18B, NDC80, BIRC5, CENPE, SMC4, FAM64A, CCNB2, MAD2L1, CENPW, BUB1B, UBE2S
GOTERM_BP_DIRECT	GO:0007067~mitotic nuclear division	6.1281e-22	9.83299e-19	NEK2, ANLN, AURKA, PTTG1, CEP55, FAM83D, KIF2C, OIP5, CDCA2, BUB1, CCNA2, CDCA5, ASPM, CDK1, CENPH, KIF11, KIF15, TPX2, NUF2, CENPF, NDC80, BIRC5, PBK, FAM64A, CCNB2, PLK1, BUB1B, CENPW
GOTERM_BP_DIRECT	GO:0007059~chromosome segregation	1.8381e-11	2.94938e-08	CENPH, KIF11, OIP5, HJURP, NEK2, NUF2, CDCA2, CENPF, CENPW, CENPE, NDC80, TOP2A
GOTERM_BP_DIRECT	GO:0007062~sister chromatid cohesion	1.1656e-10	1.8703e-07	CENPH, NUF2, CENPF, NDC80, BIRC5, CENPE, KIF2C, CDCA8, MAD2L1, PLK1, BUB1, BUB1B, CDCA5
GOTERM_BP_DIRECT	GO:0008283~cell proliferation	6.18608e-10	9.92602e-07	CDK1, ERBB4, MKI67, DLGAP5, KIF15, UCHL1, TPX2, IGF1, CENPF, DACH1, MCM10, FAM83D, TYMS, KIF2C, PLK1, BUB1, BUB1B, TCF19, FOXC1, MELK
GOTERM_BP_DIRECT	GO:0007018~microtubule-based movement	4.05248e-08	6.50251e-05	MKLP-1, KIF14, KIF2C, KIF11, KIF15, KIF5C, KIF18B, CENPE, DNAH5, KIF20A
GOTERM_BP_DIRECT	GO:0000070~mitotic sister chromatid segregation	6.79865e-08	0.000109089	MAD2L1, PLK1, NEK2, NUSAP1, KIF18B, NDC80, SMC4
GOTERM_BP_DIRECT	GO:0000082~G1/S transition of mitotic cell cycle	3.03811e-07	0.000487486	CDC7, CCNE1, CDK1, TYMS, CDC45, CDKN2A, RRM2, MCM10, CDKN3, CDCA5
GOTERM_BP_DIRECT	GO:0007094~mitotic spindle assembly checkpoint	7.16132e-07	0.00114908	MAD2L1, PLK1, BUB1, CENPF, TTK, BUB1B
GOTERM_BP_DIRECT	GO:0006260~DNA replication	1.22266e-06	0.00196184	EXO1, CDC7, CDK1, CDC45, BLM, DTL, RRM2, IGF1, BRIP1, CHEK1, MCM10
GOTERM_BP_DIRECT	GO:0051310~metaphase plate congression	2.78868e-06	0.00447456	FAM83D, KIF2C, CENPF, CENPE, NDC80
GOTERM_BP_DIRECT	GO:0000086~G2/M transition of mitotic cell cycle	3.65132e-06	0.00585865	CDK1, CCNB2, PLK1, NEK2, TPX2, BIRC5, CHEK1, AURKA, MELK, HMMR
GOTERM_BP_DIRECT	GO:0000281~mitotic cytokinesis	5.14333e-06	0.00825254	MKLP-1, PLK1, NUSAP1, ANLN, CEP55, KIF20A
GOTERM_CC_DIRECT	GO:0000775~chromosome, centromeric region	1.49775e-15	1.80966e-12	CENPH, MKI67, NUF2, CENPF, NDC80, BIRC5, CENPE, SUV39H2, KIF2C, CDCA8, HJURP, OIP5, CENPW, CDCA5
GOTERM_CC_DIRECT	GO:0030496~midbody	8.68581e-11	1.08688e-07	MKLP-1, KIF14, CDK1, CDCA8, PRC1, PLK1, NEK2, CENPF, CENPE, BIRC5, AURKA, CEP55, ASPM, KIF20A
GOTERM_CC_DIRECT	GO:0005634~nucleus	1.29022e-10	1.61449e-07	MKLP-1, PRC1, PRR11, EZH2, AURKA, PTTG1, MCM10, ZIC1, GLI3, PGR, KIF2C, AZGP1, CCNE1, CDCA8, CDC45, CDKN2A, CDCA7, OIP5, GATA3, TOP2A, CCNA2, CDCA5, ASPM, KIF14, CDC7, CDK1, PRAME, DTL, ANP32E, TPX2, ESR1, MND1, NUSAP1, GZMB, DEPDC1, PBK, AMIGO2, MAD2L1, CPE, RRM2, TFAP2B, HORMAD1, FOXC1, UBE2T, MELK, ERBB4, BLM, NEK2, ANKRD30A, NOSTRIN, CHEK1, MYBL1, TYMS, HJURP, NCAPG, PIR, CT83, PIP, ARNTL2, T…
GOTERM_CC_DIRECT	GO:0000777~condensed chromosome kinetochore	2.17423e-10	2.72068e-07	CENPH, KIF2C, MAD2L1, HJURP, NEK2, NUF2, BUB1, CENPW, BUB1B, CENPE, BIRC5, NDC80
GOTERM_CC_DIRECT	GO:0000776~kinetochore	1.87665e-09	2.34832e-06	KIF2C, MAD2L1, PLK1, NEK2, BUB1, CENPF, TTK, CENPW, BUB1B, CENPE, NDC80
GOTERM_CC_DIRECT	GO:0005654~nucleoplasm	6.25056e-09	7.82154e-06	MKLP-1, PRC1, EZH2, UCHL1, AURKA, ZIC1, MCM10, GLI3, PGR, CCNE1, CDCA8, CDC45, CDCA7, CDKN2A, OIP5, GATA3, CDCA2, TOP2A, CDCA5, CCNA2, CDC7, CDK1, DTL, ESR1, TPX2, RUNX1T1, DEPDC1, RRM2, FOXC1, UBE2T, BLM, ERBB4, CHEK1, ANLN, TYMS, HJURP, SYBU, BUB1, EXO1, GINS1, CENPH, RAD51AP1, ATAD2, BRIP1, AFF3, CENPF, BIRC5, SMC4, SUV39H2, CCNB2, PLK1, CENPW, FABP5, KIF20A
GOTERM_CC_DIRECT	GO:0005819~spindle	7.71448e-09	9.65339e-06	MKLP-1, KIF11, PRC1, PLK1, KIF15, TPX2, NUSAP1, CENPF, TTK, BIRC5, AURKA, KIF20A
GOTERM_CC_DIRECT	GO:0005874~microtubule	1.19157e-08	1.49105e-05	KIF14, MKLP-1, KIF11, NEK2, KIF5C, KIF15, TPX2, NUSAP1, KIF18B, AURKA, BIRC5, CENPE, DNAH5, KIF2C, MAPT, SYBU, KIF20A
GOTERM_CC_DIRECT	GO:0005871~kinesin complex	3.40468e-07	0.000426039	MKLP-1, KIF14, KIF2C, KIF11, KIF5C, KIF18B, CENPE, KIF20A
GOTERM_CC_DIRECT	GO:0005876~spindle microtubule	2.00086e-06	0.00250371	CDK1, KIF11, PRC1, PLK1, NUSAP1, BIRC5, AURKA
GOTERM_MF_DIRECT	GO:0003777~microtubule motor activity	1.57652e-09	2.11412e-06	MKLP-1, KIF14, KIF2C, DNALI1, KIF11, KIF15, KIF5C, KIF18B, CENPE, DNAH5, KIF20A
GOTERM_MF_DIRECT	GO:0008017~microtubule binding	3.16598e-09	4.24558e-06	KIF14, MKLP-1, KIF11, PRC1, KIF5C, KIF15, NUSAP1, KIF18B, CENPE, BIRC5, FAM83D, PLK1, MAPT, SYBU, KIF20A
GOTERM_MF_DIRECT	GO:0005524~ATP binding	3.31326e-07	0.000444308	MKLP-1, BLM, ERBB4, NEK2, CTPS1, TTK, CHEK1, AURKA, DNAH5, KIF2C, BUB1, TOP2A, TRIP13, CDC7, KIF14, CDK1, KIF11, MKI67, KIF15, PDK4, KIF5C, TPX2, BRIP1, ATAD2, KIF18B, CENPE, PBK, SMC4, PLK1, BUB1B, UBE2S, MELK, UBE2T, KIF20A
GOTERM_MF_DIRECT	GO:0005515~protein binding	5.04068e-06	0.00675934	PRC1, IL6ST, TTK, AURKA, PTTG1, MCM10, PGR, AZGP1, CDCA8, CDKN2A, APOD, OIP5, GATA3, CCNA2, CDCA5, PRAME, DTL, KIF5C, BCL2A1, DEPDC1, NME5, MAD2L1, CX3CR1, TFAP2B, SLC40A1, SCGB2A2, ERBB4, BLM, NEK2, CHEK1, NOSTRIN, PPP1R3C, ECE2, PIR, SYBU, PIP, TFF3, PLAT, MKI67, NTN4, NUF2, BRIP1, NDC80, SUV39H2, FAM64A, PLK1, AGR3, FABP5, MKLP-1, MLPH, EZH2, UCHL1, RAI2, GLI3, FAM83D, KIF2C, CCNE1, CDC45, SCR…
KEGG_PATHWAY	hsa04110:Cell cycle	1.02503e-10	1.18018e-07	CDC7, CDK1, TTK, CHEK1, PTTG1, CCNE1, CDC45, CDKN2A, CCNB2, MAD2L1, PLK1, BUB1, BUB1B, CCNA2
KEGG_PATHWAY	hsa04114:Oocyte meiosis	9.19008e-07	0.00105811	PGR, CCNE1, CDK1, MAD2L1, CCNB2, PLK1, BUB1, IGF1, AURKA, PTTG1
