# Supplementary material for: Identification of NUF2 and FAM83D as potential biomarkers in triple-negative breast cancer
Source: PeerJ. 2020 Sep 21;8:e9975. doi: 10.7717/peerj.9975 (PMC7513746; doi:10.7717/peerj.9975)
Supplement: File S4 — The mRNA expression levels of NUF2, FAM83D and CENPH in 14 pairs of triple-negative breast cancer (TNBC) paired tissues were determined by RT-qPCR. [file peerj-08-9975-s004.xlsx]

## Sheet: NUF2
The mRNA relative expression of NUF2 in TNBC tissues and adjacent normal tissues
	GAPDH		NUF2					GAPDH		NUF2
	Ct	Ct average	Ct	Ct average	△Ct			Ct	Ct average	Ct	Ct average	△Ct	△△Ct	2—△△Ct
Tumor01-1	19.42	19.2367	28.83	28.31	9.07333		Adjacent01-1	19.91	20.0033	30.27	30.3933	10.39	-1.31667	2.4909
Tumor01-2	19.01		28.77				Adjacent01-2	20.26		30.3
Tumor01-3	19.28		27.33				Adjacent01-3	19.84		30.61
Tumor02-1	18.52	18.61	26.67	26.9167	8.30667		Adjacent02-1	20.23	20.26	29.81	30.1533	9.89333	-1.58667	3.00355
Tumor02-2	18.51		27.15				Adjacent02-2	20.32		30.44
Tumor02-3	18.8		26.93				Adjacent02-3	20.23		30.21
Tumor03-1	18.57	18.47	27.65	27.14	8.67		Adjacent03-1	20.55	20.4633	30.44	30.1433	9.68	-1.01	2.01391
Tumor03-2	18.15		26.52				Adjacent03-2	20.51		29.88
Tumor03-3	18.69		27.25				Adjacent03-3	20.33		30.11
Tumor04-1	19.87	19.5	27.51	27.8367	8.33667		Adjacent04-1	20.18	20.1867	30.53	30.1033	9.91667	-1.58	2.9897
Tumor04-2	19.01		27.65				Adjacent04-2	19.8		30.22
Tumor04-3	19.62		28.35				Adjacent04-3	20.58		29.56
Tumor05-1	18.35	18.5433	26.58	27.33	8.78667		Adjacent05-1	20.2	20.1133	29.08	29.9767	9.86333	-1.07667	2.10916
Tumor05-2	18.42		27.78				Adjacent05-2	20.34		30.23
Tumor05-3	18.86		27.63				Adjacent05-3	19.8		30.62
Tumor06-1	18.53	18.7433	27.64	27.57	8.82667		Adjacent06-1	20.29	20.34	29.27	29.68	9.34	-0.513333	1.42734
Tumor06-2	18.98		27.26				Adjacent06-2	20.13		30.59
Tumor06-3	18.72		27.81				Adjacent06-3	20.6		29.18
Tumor07-1	19.05	18.5667	27.89	27.6833	9.11667		Adjacent07-1	19.9	20.02	30.72	30.1767	10.1567	-1.04	2.05623
Tumor07-2	17.96		27.14				Adjacent07-2	20.09		30.74
Tumor07-3	18.69		28.02				Adjacent07-3	20.07		29.07
Tumor08-1	18.55	18.65	27.81	27.3133	8.66333		Adjacent08-1	19.6	19.7033	30.04	30.1967	10.4933	-1.83	3.55537
Tumor08-2	18.85		26.71				Adjacent08-2	19.57		30.21
Tumor08-3	18.55		27.42				Adjacent08-3	19.94		30.34
Tumor09-1	19.01	18.37	26.43	27.0033	8.63333		Adjacent09-1	20.38	20.1667	29.68	29.95	9.78333	-1.15	2.21914
Tumor09-2	17.96		26.87				Adjacent09-2	19.7		30.55
Tumor09-3	18.14		27.71				Adjacent09-3	20.42		29.62
Tumor10-1	19.02	18.67	27.52	26.97	8.3		Adjacent10-1	19.52	19.86	30.18	30.4633	10.6033	-2.30333	4.93597
Tumor10-2	18.04		27.05				Adjacent10-2	19.67		30.79
Tumor10-3	18.95		26.34				Adjacent10-3	20.39		30.42
Tumor11-1	17.97	18.5067	26.36	26.56	8.05333		Adjacent11-1	20.46	20.37	29.63	29.6433	9.27333	-1.22	2.32947
Tumor11-2	18.72		26.44				Adjacent11-2	20.09		30.19
Tumor11-3	18.83		26.88				Adjacent11-3	20.56		29.11
Tumor12-1	18.71	18.61	27.78	27.38	8.77		Adjacent12-1	20.33	19.9067	30.1	30.0833	10.1767	-1.40667	2.65124
Tumor12-2	18.78		27.6				Adjacent12-2	19.7		29.76
Tumor12-3	18.34		26.76				Adjacent12-3	19.69		30.39
Tumor13-1	18.2	18.3567	27.95	27.1433	8.78667		Adjacent13-1	19.55	19.6467	29.37	29.9067	10.26	-1.47333	2.77663
Tumor13-2	18.77		26.71				Adjacent13-2	19.74		30.6
Tumor13-3	18.1		26.77				Adjacent13-3	19.65		29.75
Tumor14-1	17.95	18.49	27.28	27.3767	8.88667		Adjacent14-1	20.02	20.14	30.92	30.2767	10.1367	-1.25	2.37841
Tumor14-2	19.04		27.14				Adjacent14-2	20.33		30.33
Tumor14-3	18.48		27.71				Adjacent14-3	20.07		29.58

## Sheet: FAM83D
The mRNA relative expression of FAM83D in TNBC tissues and adjacent normal tissues
	GAPDH		FAM83D					GAPDH		FAM83D
	Ct	Ct average	Ct	Ct average	△Ct			Ct	Ct average	Ct	Ct average	△Ct	△△Ct	2—△△Ct
Tumor01-1	19.35	19.1567	29.27	29.33	10.1733		Adjacent01-1	19.93	20.4333	30.98	30.6967	10.2633	-0.09	1.06437
Tumor01-2	19.71		29.53				Adjacent01-2	20.74		30.27
Tumor01-3	18.41		29.19				Adjacent01-3	20.63		30.84
Tumor02-1	19.82	19.1	29.52	30.12	11.02		Adjacent02-1	20.81	20.1533	30.64	31.3433	11.19	-0.17	1.12506
Tumor02-2	18.58		30.4				Adjacent02-2	19.75		31.96
Tumor02-3	18.9		30.44				Adjacent02-3	19.9		31.43
Tumor03-1	19.79	19.4467	30.89	29.9667	10.52		Adjacent03-1	20.9	20.3233	32.01	31.4067	11.0833	-0.563333	1.47768
Tumor03-2	20.13		29.75				Adjacent03-2	19.87		31.19
Tumor03-3	18.42		29.26				Adjacent03-3	20.2		31.02
Tumor04-1	18.78	19.1833	29.25	29.9433	10.76		Adjacent04-1	19.23	19.41	31.21	30.6767	11.2667	-0.506667	1.42076
Tumor04-2	19.67		30.72				Adjacent04-2	19.82		30.81
Tumor04-3	19.1		29.86				Adjacent04-3	19.18		30.01
Tumor05-1	18.36	19.3333	30.11	30.2167	10.8833		Adjacent05-1	19.18	19.57	31.78	31.52	11.95	-1.06667	2.09459
Tumor05-2	19.9		31.02				Adjacent05-2	19.66		31
Tumor05-3	19.74		29.52				Adjacent05-3	19.87		31.78
Tumor06-1	19.35	19.8233	29.57	30.1433	10.32		Adjacent06-1	19.93	20.2467	30.75	31.0167	10.77	-0.45	1.36604
Tumor06-2	19.99		29.74				Adjacent06-2	20.01		31.91
Tumor06-3	20.13		31.12				Adjacent06-3	20.8		30.39
Tumor07-1	19.54	19.38	29.43	29.5767	10.1967		Adjacent07-1	19.49	19.8933	30.21	30.9767	11.0833	-0.886667	1.8489
Tumor07-2	19.27		29.26				Adjacent07-2	19.98		31.93
Tumor07-3	19.33		30.04				Adjacent07-3	20.21		30.79
Tumor08-1	18.78	18.97	29.88	30.0667	11.0967		Adjacent08-1	20.57	20.22	31.59	31.6267	11.4067	-0.31	1.23971
Tumor08-2	19.53		30.09				Adjacent08-2	19.95		31.33
Tumor08-3	18.6		30.23				Adjacent08-3	20.14		31.96
Tumor09-1	19.99	19.7733	31.2	30.66	10.8867		Adjacent09-1	20.08	19.5367	30.87	31.0733	11.5367	-0.65	1.56917
Tumor09-2	19.46		30.83				Adjacent09-2	19.14		31.1
Tumor09-3	19.87		29.95				Adjacent09-3	19.39		31.25
Tumor10-1	19.44	19.1567	30.21	29.6	10.4433		Adjacent10-1	19.17	19.53	30.45	31.14	11.61	-1.16667	2.24492
Tumor10-2	18.33		29.34				Adjacent10-2	19.74		31.76
Tumor10-3	19.7		29.25				Adjacent10-3	19.68		31.21
Tumor11-1	18.86	19.0867	30.47	30.2933	11.2067		Adjacent11-1	19.67	19.6367	30.96	31	11.3633	-0.156667	1.11471
Tumor11-2	20.03		30.05				Adjacent11-2	19.37		30.9
Tumor11-3	18.37		30.36				Adjacent11-3	19.87		31.14
Tumor12-1	19.74	19.7633	30.03	30.19	10.4267		Adjacent12-1	20.41	20.22	31.23	30.9	10.68	-0.253333	1.19196
Tumor12-2	20.21		30.32				Adjacent12-2	19.53		31.02
Tumor12-3	19.34		30.22				Adjacent12-3	20.72		30.45
Tumor13-1	19.65	19.3967	31.28	30.0233	10.6267		Adjacent13-1	20.56	19.8167	31.17	30.9567	11.14	-0.513333	1.42734
Tumor13-2	18.77		29.37				Adjacent13-2	19.56		30.88
Tumor13-3	19.77		29.42				Adjacent13-3	19.33		30.82
Tumor14-1	19.87	19.9767	31.04	29.8767	9.9		Adjacent14-1	19.74	19.7633	30.19	30.5367	10.7733	-0.873333	1.83189
Tumor14-2	20.26		29.25				Adjacent14-2	20.19		29.96
Tumor14-3	19.8		29.34				Adjacent14-3	19.36		31.46

## Sheet: CENPH
The mRNA relative expression of CENPH in TNBC tissues and adjacent normal tissues
	GAPDH		CENPH					GAPDH		CENPH
	Ct	Ct average	Ct	Ct average	△Ct			Ct	Ct average	Ct	Ct average	△Ct	△△Ct	2—△△Ct
Tumor01-1	19.28	18.3367	28.24	28.0167	9.68		Adjacent01-1	18.79	19.0267	28.98	28.9567	9.93	-0.25	1.18921
Tumor01-2	17.75		28.05				Adjacent01-2	19.31		29.02
Tumor01-3	17.98		27.76				Adjacent01-3	18.98		28.87
Tumor02-1	18.75	19.09	28.14	27.9833	8.89333		Adjacent02-1	19.99	19.8767	29.26	29.4167	9.54	-0.646667	1.56555
Tumor02-2	19.03		27.79				Adjacent02-2	19.67		29.7
Tumor02-3	19.49		28.02				Adjacent02-3	19.97		29.29
Tumor03-1	19.48	19.2833	28.18	28.4067	9.12333		Adjacent03-1	21.15	21.2433	30.67	30.7933	9.55	-0.426667	1.34412
Tumor03-2	18.78		28.38				Adjacent03-2	21.34		30.39
Tumor03-3	19.59		28.66				Adjacent03-3	21.24		31.32
Tumor04-1	19.23	19.0267	29.15	28.9833	9.95667		Adjacent04-1	19.06	19.2833	28.88	28.9833	9.7	0.256667	0.83702
Tumor04-2	19.52		28.76				Adjacent04-2	19.7		28.77
Tumor04-3	18.33		29.04				Adjacent04-3	19.09		29.3
Tumor05-1	19.21	19.1367	28.86	28.7933	9.65667		Adjacent05-1	18.72	18.9667	29.25	28.74	9.77333	-0.116667	1.08423
Tumor05-2	19.22		28.9				Adjacent05-2	19.1		28.59
Tumor05-3	18.98		28.62				Adjacent05-3	19.08		28.38
Tumor06-1	19.06	19.1767	28.07	28.11	8.93333		Adjacent06-1	19.76	20.09	28.82	28.5367	8.44667	0.486667	0.713672
Tumor06-2	18.86		28.02				Adjacent06-2	20.5		28.4
Tumor06-3	19.61		28.24				Adjacent06-3	20.01		28.39
Tumor07-1	20.38	20.4167	28.99	28.49	8.07333		Adjacent07-1	19.7	19.6	27.76	27.9733	8.37333	-0.3	1.23114
Tumor07-2	20.33		27.8				Adjacent07-2	19.98		27.88
Tumor07-3	20.54		28.68				Adjacent07-3	19.12		28.28
Tumor08-1	19.64	19.09	28.6	28.1367	9.04667		Adjacent08-1	20.52	20.5633	29.91	29.97	9.40667	-0.36	1.28343
Tumor08-2	19.61		28.05				Adjacent08-2	19.86		29.99
Tumor08-3	18.02		27.76				Adjacent08-3	21.31		30.01
Tumor09-1	19.68	18.83	28.82	28.6467	9.81667		Adjacent09-1	19.59	19.61	29.32	28.92	9.31	0.506667	0.703847
Tumor09-2	17.9		28.78				Adjacent09-2	19.41		29.08
Tumor09-3	18.91		28.34				Adjacent09-3	19.83		28.36
Tumor10-1	19.51	20.0167	29.3	28.8333	8.81667		Adjacent10-1	20.47	20.0933	28.53	29.0733	8.98	-0.163333	1.11987
Tumor10-2	20.56		28.7				Adjacent10-2	19.55		29.35
Tumor10-3	19.98		28.5				Adjacent10-3	20.26		29.34
Tumor11-1	20.62	20.1	29.62	28.96	8.86		Adjacent11-1	20.03	20.01	28.75	28.7533	8.74333	0.116667	0.922316
Tumor11-2	19.95		28.76				Adjacent11-2	19.83		28.5
Tumor11-3	19.73		28.5				Adjacent11-3	20.17		29.01
Tumor12-1	18.94	18.9567	28.42	28.1533	9.19667		Adjacent12-1	19.52	19.45	28.58	28.6033	9.15333	0.0433333	0.97041
Tumor12-2	19.11		27.75				Adjacent12-2	20.09		28.57
Tumor12-3	18.82		28.29				Adjacent12-3	18.74		28.66
Tumor13-1	18.46	18.6	28.66	28.42	9.82		Adjacent13-1	19.81	19.9867	29.01	29.1767	9.19	0.63	0.646176
Tumor13-2	18.97		27.97				Adjacent13-2	19.94		29.32
Tumor13-3	18.37		28.63				Adjacent13-3	20.21		29.2
Tumor14-1	18.5	18.7267	27.59	27.71	8.98333		Adjacent14-1	21.17	20.7833	29.39	29.5	8.71667	0.266667	0.831238
Tumor14-2	19.02		27.89				Adjacent14-2	20.54		29.31
Tumor14-3	18.66		27.65				Adjacent14-3	20.64		29.8
